1 Article

# 2 Behavioral effects of developmental exposure to JWH- 3 018 in wild type and disrupted in schizophrenia 1 4 (*disc1*) mutant zebrafish

5 Judit García-González<sup>1</sup>, Bruno de Quadros<sup>2</sup>, Alistair J. Brock<sup>3</sup> and Caroline H. Brennan<sup>4\*</sup>,

6 <sup>1</sup> School of Biological and Chemical Sciences, Queen Mary, University of London, United Kingdom;  
7 [judit@perala.es](mailto:judit@perala.es)

8 <sup>2</sup> School of Biological and Chemical Sciences, Queen Mary, University of London, United Kingdom;  
9 [brunoquadros@hotmail.com](mailto:brunoquadros@hotmail.com)

10 <sup>3</sup> Leica Biosystems Newcastle Ltd, [alistair.brock@leicabiosystems.com](mailto:alistair.brock@leicabiosystems.com)

11 <sup>4</sup> School of Biological and Chemical Sciences, Queen Mary, University of London, United Kingdom;  
12 [c.h.brennan@qmul.ac.uk](mailto:c.h.brennan@qmul.ac.uk)

13

14 \* Correspondence: [c.h.brennan@qmul.ac.uk](mailto:c.h.brennan@qmul.ac.uk)

15

## 16 Abstract:

17

18 Synthetic cannabinoids can cause acute adverse psychological effects, but the potential impact when  
19 exposure happens before birth is unknown. Use of synthetic cannabinoids during pregnancy may  
20 affect fetal brain development, and such effects could be moderated by the genetic makeup of an  
21 individual. Disrupted in schizophrenia 1 (*DISC1*) is a gene with important roles in neurodevelopment  
22 which has been associated with psychiatric disorders in pedigree analyses. Using zebrafish as a  
23 model, we investigated (1) the behavioral impact of developmental exposure to JWH-018 (a common  
24 psychoactive synthetic cannabinoid) and (2) whether *disc1* moderates the effects of JWH-018. As  
25 altered anxiety responses are seen in a several psychiatric disorders, we focused on zebrafish anxiety-  
26 like behavior. Zebrafish embryos were exposed to JWH-018 from one to six days post-fertilization.  
27 Anxiety-like behavior was assessed using forced light/dark and acoustic startle assays in larvae, and  
28 novel tank diving in adults. Compared to controls, developmentally exposed zebrafish larvae had  
29 impaired locomotion during the forced light/dark test, but anxiety levels and response to startle  
30 stimuli was unaltered. Adult zebrafish developmentally exposed to JWH-018 spent less time on the  
31 bottom of the tank, suggesting decreased anxiety. Loss-of-function in *disc1* increased anxiety but did  
32 not alter sensitivity to JWH-018. Results suggest developmental exposure to JWH-018 has behavioral  
33 impact in zebrafish, which is not moderated by *disc1*.

34 **Keywords:** zebrafish; cannabinoids; *disc1*; JWH-018; THC; nicotine.

35

---

## 36 1. Introduction

37 In contrast to tobacco smoking, where prevalence during pregnancy has dropped from 14.6 to 10.6%  
38 in the United Kingdom [1], cannabis use among pregnant women has risen in recent years [2].  
39 Cannabis does have medical utility for some conditions and may help pregnant women to alleviate  
40 nausea that usually accompanies pregnancy. However, cannabis may also affect fetal  
41 neurodevelopment, leading to long-term behavioral alterations [3]: The endocannabinoid system is  
42 present and plays an important role in early brain development [4]. Delta-9-tetrahydrocannabinol  
43 (THC) is the major psychoactive component of marijuana and can cross the placental barrier [3]. Thus,  
44 THC is able to bind the cannabinoid receptors located in the fetus brain, interfering with the  
45 endocannabinoid system and affecting neurogenesis and neuronal migration [3].

46 Similar to cannabis, synthetic cannabinoids commercialized as ‘Spice’, ‘K2’, ‘legal weed’ or ‘herbal  
47 incense’ gained popularity during the early 2000s and were legal in many countries for years [5]. The  
48 prevalence of synthetic cannabinoid consumption ranges between 0.2-4% in the general population  
49 [6], but prevalence estimates in pregnant women are unavailable, and it is likely that reported  
50 exposures are significantly underestimated.

51 JWH-018 (1-pentyl-3-(1-naphthoyl)indole) is one of the most common psychoactive synthetic  
52 cannabinoids. JWH-018 has high binding affinity for the cannabinoid receptors CB1 and CB2 [7,8]  
53 and mimics the physiological effects of THC through activation of the CB1 receptor [9]. Importantly,  
54 whereas THC is a partial agonist with weak affinity for CB1, JWH-018 is a full CB1/CB2 agonist with  
55 effects four to eight times more potent than THC [10,11]. Due to its potent effect, adverse outcomes  
56 associated with using synthetic cannabinoids containing JWH-018 may be more frequent and severe  
57 than those arising from cannabis consumption. Epidemiological studies show that acute intake of  
58 JWH-018 can cause strong psychological effects such as anxiety, psychosis, hallucination and  
59 alterations in cognitive abilities [12,13]. Given the potent adverse effects of acute exposure in adults,  
60 it is important to understand the short and long-lasting consequences of JWH-018 exposure during  
61 brain development. However, such consequences still remain unknown [14].

62 Genetic vulnerability to the effects of maternal drug intake during pregnancy may exacerbate adverse  
63 outcomes in the offspring. In particular, some genes that play important roles in neurodevelopment  
64 may modulate the effects of developmental exposure to drugs. Disrupted in Schizophrenia 1 (*DISC1*)  
65 is a gene in chromosome 1q42.1 that encodes a scaffolding protein with several protein interactions.  
66 Over 100 proteins have been suggested to interact with *DISC1* [15], highlighting the pivotal role of  
67 this protein during neurodevelopmental processes such as neuronal proliferation and migration,  
68 neuron spine formation, and synapse maintenance [15].

69 *DISC1* was identified in a Scottish family pedigree, where a translocation between chromosome 1 and  
70 11 [(t(1;11)(q42.1;q14.3)] segregated with psychiatric disorders including schizophrenia, depression,  
71 and bipolar disorder [16,17]. The association between *DISC1* and psychiatric disorders was replicated  
72 in a second American pedigree with a 4 bp frameshift deletion in *DISC1* exon 12 [18]. However, there  
73 has been controversy regarding the relevance of this gene to psychiatric disorders as it seems likely  
74 that the association of *DISC1* with psychiatric disorders is driven by rare genetic variation that  
75 predisposes to psychiatric disorders only in certain individuals.

76 Despite the controversy about whether genetic variation in *DISC1* influences vulnerability to  
77 psychiatric disorders, there is consensus that *DISC1* plays an important role in neurodevelopment  
78 [15,19]. There is also some evidence suggesting that alterations due to *DISC1* loss-of-function are  
79 exacerbated by exposure to cannabinoids. *Disc1* mutant mice are more susceptible to deficits in fear-  
80 associated memory after exposure to THC during adolescence [20]. Perturbation of expression of  
81 *Disc1* in astrocytes, but not neurons, exacerbated the effects of adolescent THC exposure on  
82 recognition memory assessed in adult mice [21]. Altered expression of *Disc1* and THC exposure  
83 caused synergistic activation of the proinflammatory nuclear factor- $\kappa$ B–cyclooxygenase-2 pathway  
84 in astrocytes, leading to secretion of glutamate and dysfunction of GABAergic neurons in the  
85 hippocampus [21]. These studies suggest that *Disc1* loss-of-function exacerbates the behavioral effects  
86 of THC exposure during adolescence, but no studies have yet examined the effects on earlier  
87 developmental exposures, nor the interaction of other cannabinoids (i.e. JWH-018) with *Disc1*.

88 Mammalian models such as rodents have been used to investigate early development and the effect  
89 of prenatal exposure to drugs of abuse (reviewed in [22]). Although these models are valuable, they  
90 present significant limitations: a mammalian fetus cannot be directly accessed and thus it is  
91 challenging to follow fetal neurodevelopment in vivo. In utero embryonic development makes it  
92 difficult to separate maternal and embryonic effects of exposure. Moreover, mammalian models are  
93 not suitable to fill the need for fast and high throughput screening of large numbers of compounds

94 and mixtures, as well as multiple candidate biological pathways and their interactions. Using these  
95 models for experimental purposes would result in high costs of animal maintenance together with  
96 large space-requirements and relatively long gestation periods.

97 Zebrafish present important advantages over mammalian models [23]: firstly, embryos develop  
98 externally, and thus exposure is done directly through the water and not by maternal transfer.  
99 Secondly, embryonic development is only a five-day period from fertilization to a free-swimming  
100 and feeding larvae, therefore screening for potential neurobehavioral alterations is available within  
101 days of embryonic exposure. Thirdly, high fecundity of breeding adults provides sample sizes  
102 suitable for high-throughput screening experiments with multiple treatments/doses. Embryos/larvae  
103 fit into 96-well plates and are able to absorb small molecules through the skin, which removes issues  
104 regarding formulation. Furthermore, the embryos are transparent, which allows for easy monitoring  
105 of their development and for identifying abnormalities. Although zebrafish cannot develop human  
106 psychiatric disorders, they can display behaviors that resemble stress [24], anxiety [25] or drug  
107 seeking [26]. These behaviors are often called 'intermediate phenotypes' or 'endophenotypes' [27]  
108 and are assumed to be closer to the underlying genetic causes of psychiatric disorders [28]. Zebrafish  
109 are therefore an ideal animal model to investigate the short- and long-lasting effects of developmental  
110 exposure to drugs of abuse.

111 Our two main aims were to interrogate whether the developing central nervous system is susceptible  
112 to the effects of JWH-018, and to investigate whether loss-of-function mutations in the *disc1* gene  
113 exacerbates the effects of early developmental exposure to JWH-018. Using zebrafish as the animal  
114 model, we addressed the following research questions: (1) does developmental exposure to JWH-018  
115 modulate behavior in larvae zebrafish?, (2) are the effects of developmental exposure to JWH-018  
116 similar to the effects of THC and nicotine?, and (3) are the short- and long-lasting effects of  
117 developmental exposure to JWH-018 exacerbated by *disc1* loss of function?

## 118 2. Materials and Methods

### 119 2.1. Experimental design and timeline

120 Wild type zebrafish were exposed to 3  $\mu$ M JWH-018 (Tocris, Cat. No. 1342), from 24 hours to six days  
121 post fertilization (dpf). At five dpf (with larvae being exposed to the drug for 96 hours), distances  
122 travelled during forced light/dark transitions were examined. Importantly, larvae were *in* the drug  
123 solution during behavioral testing, and drug was refreshed 3-5 hours prior to placing the animals  
124 into the Danio Vision Observation Chamber. At six dpf (with larvae being exposed to the drug for  
125 120 hours), response and habituation to acoustic startle stimuli were examined. Larvae were also *in*  
126 the drug solution during the response and habituation to startle stimuli test, but in this case the drug  
127 solution was not refreshed prior to testing.

128 To investigate whether the effect of JWH-018 was similar to other psychoactive substances with well  
129 characterized effects on zebrafish (namely THC and nicotine), we repeated the experimental protocol  
130 and behavioral battery in wild type zebrafish larvae using 2  $\mu$ M THC (Merck, Cat. No. T4764), and  
131 0.15  $\mu$ M nicotine (Sigma, Cat. No. N1019). Drugs were refreshed with the same time course.

132 To examine the potential interactions between JWH-018 exposure and *disc1* mutations in the short  
133 and long term, we repeated the developmental exposure to 3  $\mu$ M JWH-018 using *disc1* wild type and  
134 mutant zebrafish and their behavior was assessed at five and six dpf (as in experiments with wild  
135 type zebrafish). Furthermore, *disc1* wild type and mutant zebrafish treated with JWH-018 but not  
136 used for larval behavioral testing were reared to adulthood in normal conditions. At four months old,  
137 the anxiety-like response of the exposed vs non-exposed fish was assessed using the novel tank  
138 diving procedure. An overview of the study design and experimental timeline is represented in  
139 Figure 1.

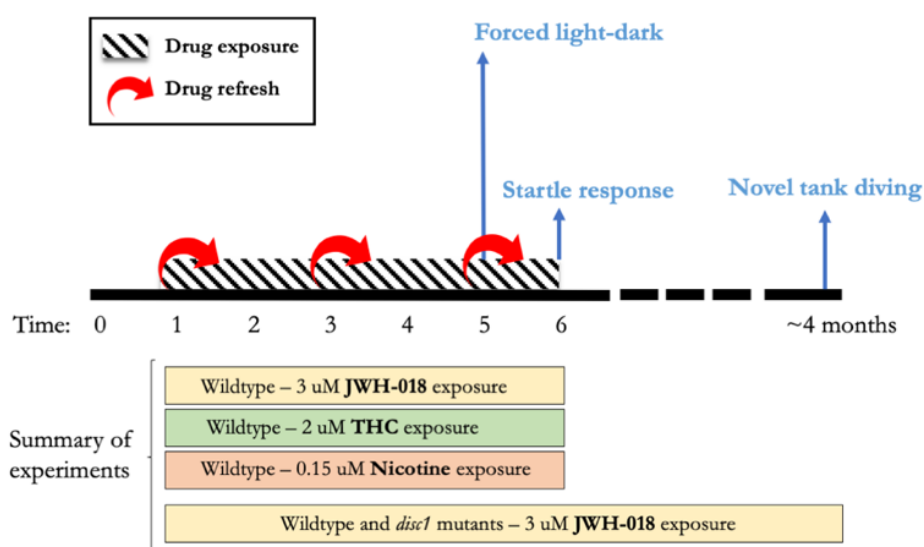

140

141 **Figure 1.** Experimental timeline for developmental exposure to JWH-018, THC, and nicotine.  
142 Horizontal bars in the lower part of the figure represent experiments carried out. The behavioral tests  
143 performed are represented in light blue.

## 144 2.2. Animal maintenance

145 Zebrafish were housed in a recirculating system (Techniplast, UK) on a 14hour:10hour light:dark  
146 cycle (08:30–22:30). The housing and testing rooms were at ~25–28°C. Zebrafish were maintained in  
147 aquarium-treated water and fed three times daily with live artemia (twice) and flake food (once).  
148 Wild type zebrafish belonged to the Tübingen strain. The *disc1* line (AB background strain) was  
149 obtained from the Cecilia Moens lab (Fred Hutchinson Cancer Research Center, Seattle, USA), and  
150 was provided by Dr Jon Wood (University of Sheffield). The mutant allele (*disc1<sup>fl291</sup>*) is caused by a  
151 point mutation in exon 2 (T>A), that produces an early stop codon. More information is detailed  
152 elsewhere [29].

153 To breed zebrafish, we placed them in breeding tanks which had either perforated floors or a  
154 container with marbles to isolate eggs from progenitors. We moved the animals to breeding tanks in  
155 the evening and collected eggs the following morning. Eggs were incubated in Petri dishes at 28°C  
156 until five dpf. If reared, larvae were moved to the recirculating system at six dpf and fed with  
157 commercial fry food.

158 All procedures were carried out under license in accordance with the Animals (Scientific Procedures)  
159 Act, 1986 and under guidance from the local animal welfare and ethical review board at Queen Mary  
160 University of London.

## 161 2.3. Developmental drug exposure

### 162 2.3.1. Developmental exposure to JWH-018, THC and nicotine in wild type Tübingen larvae

163 Since JWH-018 and THC are not soluble in water, JWH-018 was dissolved in DMSO (Sigma-Aldrich,  
164 Cat. No. D8418), and THC was provided by the manufacturer in methanol (MeOH). Care was taken  
165 to ensure that the final carrier concentration for all samples was 0.1% DMSO (for JWH-018  
166 experiments) and 0.01% MeOH (for THC experiments). To account for potential effects of the carrier  
167 substance, we used 0.1% DMSO and 0.01% MeOH respectively as control groups. Drug and control



168 solutions were changed every 48 hours to ensure constant drug uptake by the zebrafish embryos and  
169 to account for oxidation in the water.

170 Drug concentrations for JWH-018 and THC were chosen based on previous studies, where exposure  
171 to 2  $\mu\text{M}$  THC led to impaired locomotor response in zebrafish larvae [30], and 3  $\mu\text{M}$  JWH-018 led to  
172 behavioral alterations in rodents [31,32]. Developmental exposure to 0.15  $\mu\text{M}$  nicotine was chosen  
173 because previous studies in our lab showed this dose induced increased nicotine preference in adult  
174 zebrafish (Appendix A and supplementary Figure 3).

### 175 2.3.2. Developmental exposure to JWH-018 in *disc1* mutant larvae

176 Exposure to 3  $\mu\text{M}$  JWH-018 and behavioral testing at five and six dpf using *disc1* wild type and  
177 mutant zebrafish was carried out as for the wild type larvae. Larvae were obtained from an in cross  
178 of *disc1* heterozygous zebrafish. Therefore, larvae were a mix of wild type, homozygous and  
179 heterozygous zebrafish that were randomly allocated in the experimental plates and genotyped after  
180 behavioral testing. We performed five independent experiments on five different days. To account  
181 for variation across experiments/days, the date of testing was included as a covariate in the analyses.

## 182 2.4. Behavioral assays

### 183 2.4.1. Forced light/dark test

184 The forced light/dark test is a well-established behavioral assay in zebrafish larvae, where changes in  
185 locomotor activity due to alternating bright light/dark depend on the integrity of brain function and  
186 the correct development of the visual and nervous system. Transitions from dark to bright light cause  
187 an abrupt decrease in larval movement (freezing), and the subsequent progressive increase in  
188 movement can be interpreted as a measure of recovery to stress-reactivity and anxiety [33].

189 We conducted forced light/dark tests between 9 am and 4 pm with the drug present in the water. We  
190 placed larvae in 48-well plates. To reduce stress due to manipulation, we let them acclimate for at  
191 least one hour in ambient light before testing. Larvae were exposed to alternating light dark cycles of  
192 10 min: there was an initial 10 minutes period of dark (baseline), followed by two cycles of 10 minutes  
193 of light and 10 minutes of dark. This protocol has been used elsewhere [34]. Distances travelled were  
194 recorded using Ethovision XT software (Noldus Information Technology, Wageningen, NL) and data  
195 were outputted in one-minute time-bins. Data was fitted to linear mixed models with total distance  
196 travelled as response variable, experimental variables (e.g. genotype, dose, time) as fixed effects, and  
197 fish ID as random effects. Details on the data analysis is detailed in Appendix B.

### 198 2.4.2. Response and habituation to startle stimuli test

199 In response to abrupt sound/vibration stimuli zebrafish larvae execute a fast, non-associative learning  
200 escape response. This response has been extensively characterized and involves one of two distinct  
201 motor behaviors: a short-latency C-bend of the tail, initiating within 5–15 milliseconds of the  
202 stimulus, or a slower, long-latency C-bend response initiating within 20–80 milliseconds. These two  
203 motor behaviors use different, possibly overlapping neuronal circuitry [35] but in this study they  
204 were measured jointly, since a high-speed camera was not available.

205 When the abrupt sound/vibration stimuli are given repeatedly, zebrafish exhibit iterative reduction  
206 in the magnitude of the response, commonly known as habituation. Habituation is the mechanism  
207 by which the nervous system filters irrelevant stimuli. It is evolutionarily conserved and present in a  
208 wide range of species from invertebrates, such as *Aplysia* and *Drosophila*, to vertebrates such as  
209 rodents [36]. Defective habituation is also associated with neuropsychiatric disorders such as  
210 schizophrenia [37].

211 We assessed the response and habituation to startle stimuli between 9 am and 4 pm with the drug  
212 present in the water (but without drug refresh prior to the test). We used the DanioVision  
213 Observation Chamber, which contains a dedicated tapping device, and set the DanioVision tap  
214 stimulus at the highest intensity (intensity level: 8). Larvae were subjected to 10 sound/vibration  
215 stimuli over 10 seconds (1 second interval between each stimulus). For all experiments, distance  
216 travelled was recorded using Ethovision XT software (Noldus Information Technology, Wageningen,  
217 NL) and data were outputted in one second time-bins.

218 As proof of concept, we replicated the experiment by Best and colleagues [38], where 50 stimuli were  
219 given using 1, 5 and 20 seconds inter-stimulus intervals (ISI). Following the habituation paradigm  
220 [36], shorter ISI led to faster habituation [Effect of ISI:  $\chi^2(2)=19.04$ ,  $p<0.0001$ ] (Figure S1).

#### 221 2.4.3. Novel tank diving test

222 Novel tank diving exploits the natural tendency of zebrafish to initially stay at the bottom of a novel  
223 tank, and gradually move to upper parts of the tank. The degree of 'bottom dwelling' has been  
224 interpreted as an index of anxiety (greater bottom dwelling meaning greater anxiety) and it is  
225 conceptually similar to the rodent open-field and elevated plus maze tasks [25]. Other measures such  
226 as the distance travelled in the tank during the course of the assay and the transitions to bottom of  
227 the tank can give further insights on the hyper-responsiveness to novel environments.

228 We transported adult zebrafish (3-4 months) to the behavioral room in their housing tanks and let  
229 them acclimate to the room conditions for at least one hour before testing. Novel tank diving was  
230 assessed as previously described [39]: zebrafish were individually introduced into a 1.5 L trapezoid  
231 tank (15.2 cm x 27.9 cm x 22.5 cm x 7.1 cm) (Figure S2) and filmed for five minutes. Their behavior  
232 was tracked using EthoVision system (Noldus, Netherlands) and data were outputted in one-minute  
233 time-bins. Care was taken to ensure that experimental groups were randomized during testing.  
234 Behavioral testing was conducted between 9 am and 2 pm.

235 We analyzed three behaviors in response to the novel tank: (1) time that zebrafish spent on the bottom  
236 third of the tank, (2) total distance that zebrafish travelled in the tank over the five minutes, and (3)  
237 number of transitions to the top-bottom area of the tank. Details on the data analysis are in Appendix  
238 B.

#### 239 2.4.4. Code availability

240 Code used to analyze the behavioral assays is available at [https://github.com/juditperala/Zebrafish-](https://github.com/juditperala/Zebrafish-behaviour)  
241 [behaviour](https://github.com/juditperala/Zebrafish-behaviour).

#### 242 2.5. Competitive allele-specific PCR (KASP™) *disc1* larvae genotyping

243 After behavioral testing, DNA was extracted using the hot shock DNA extraction protocol. Since the  
244 loss-of-function in *disc1* is caused by a point mutation, we used the competitive allele-specific PCR  
245 (KASP™) assay (LGC, Biosearch Technologies) to genotype the zebrafish.

246 **Table 1.** Genomic sequence surrounding the point loss-of-function mutation (T>A, in red) for *disc1*.

| Position              | Genomic sequence surrounding the SNP polymorphism                                                                  |
|-----------------------|--------------------------------------------------------------------------------------------------------------------|
| 13:49125537- 49125647 | AGAGGGTTTCGAGAGAGACAACCTCATCAAAGTC<br>TTCAAATAAACACCATT[T/A]GCATGATGAGGAG<br>GACAATTTACCAGTGCAATCACGTGATGTTTTCAATT |

### 247 3. Results

#### 248 3.1 Effects of developmental exposure to JWH-018 on larval behavior.

##### 249 3.1.1. Forced light/dark test

250 Over the course of the forced light/dark test, time [ $\chi^2(1)=41.27$ ,  $p<0.0001$ ] and JWH-018 treatment  
251 [ $\chi^2(1)=17.53$ ,  $p<0.0001$ ] predicted distance travelled by five dpf larvae (Figure 2). Exposure to 3  $\mu\text{M}$   
252 JWH-018 impaired locomotion during baseline and dark periods. During the first minutes of the  
253 experiment, treated larvae travelled shorter distances ( $M=0.40$ ,  $SE=0.04$ ) than controls ( $M=0.50$ ,  
254  $SE=0.40$ ) [Effect of treatment during baseline:  $\chi^2(1)=0.04$ ,  $p=0.04$ ]. Over the course of the two dark  
255 periods, control larvae sharply increased their locomotion and progressively reduced it, whereas  
256 larvae treated with 3  $\mu\text{M}$  JWH-018 did not show as great an increase in movement ( $M=0.32$ ,  $SE=0.03$ )  
257 as controls ( $M=0.55$ ,  $SE=0.03$ ) [Effect of treatment during Dark1 and Dark2:  $\chi^2(1)=30.88$ ,  $p<0.0001$ ].

258 The increase in locomotion during the light periods (measured as the slopes from minute 10 to 20 for  
259 the first light period, and minute 30 to 40 for the second light period) were interpreted as a measure  
260 of recovery to stressful stimuli and anxiety-like behavior. No significant differences between the  
261 slopes of treated vs control larvae were observed for any of the two light periods ( $p>0.05$ ).

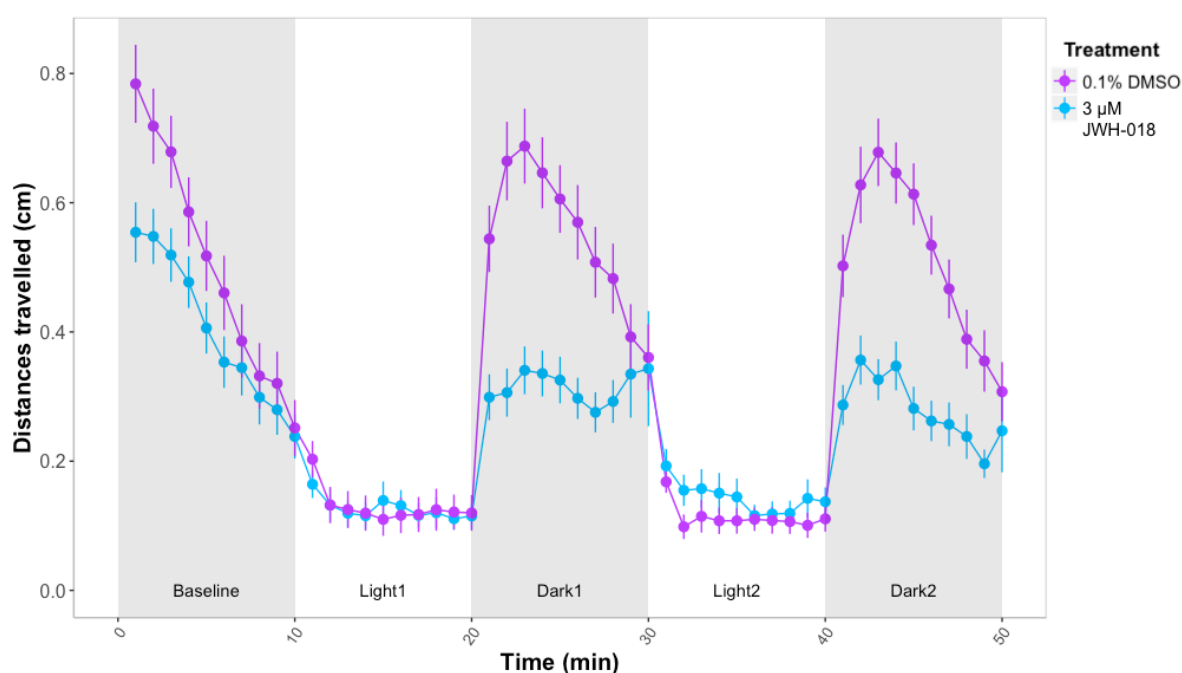

262

263 **Figure 2.** Forced light/dark test in five dpf zebrafish larvae. Sample size:  $n=64$  for each dose group.  
264 Each dot represents mean distance travelled per minute. Error bars represent  $\pm\text{SEM}$ .

##### 265 3.1.2. Response to repeated sound/vibration startle stimuli.

266 We next assessed the response to repeated startle stimuli at six dpf. There were no significant  
267 differences between 3  $\mu\text{M}$  JWH-018 treated and control larvae in distance travelled before and during  
268 the stimuli ( $p>0.05$ ) (Figure 3).

269

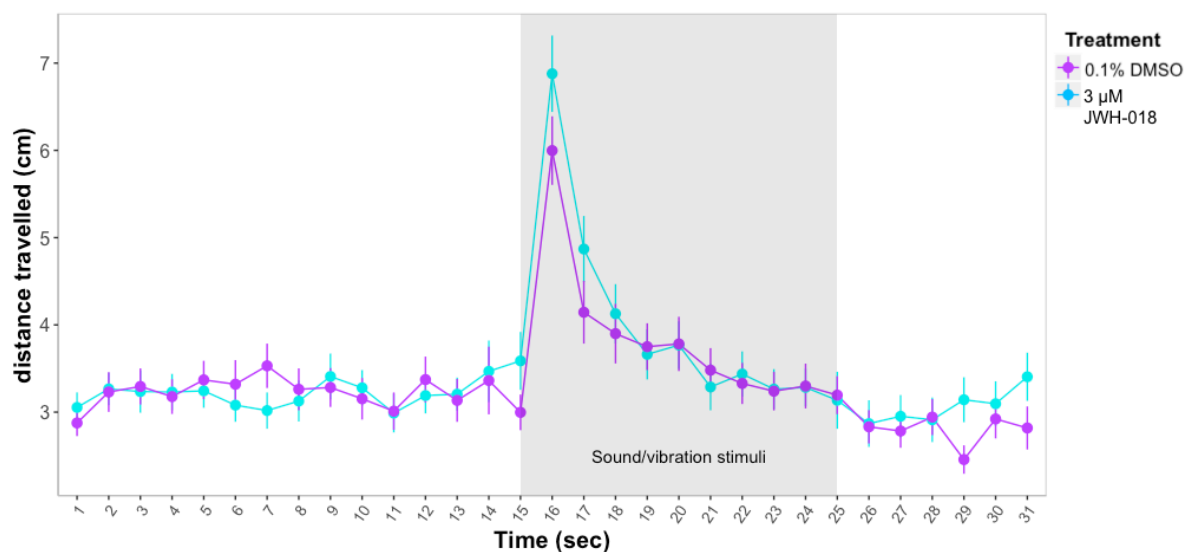

270  
271 **Figure 3.** Response and habituation to startle stimuli test in six dpf zebrafish larvae. Sample sizes:  
272 control: n=87, JWH-018 treated: n=81. Each dot represents mean distance travelled per second. Error  
273 bars represent  $\pm$ SEM.

274 3.2. Effects of developmental exposure to THC and nicotine on larval behavior.

275 3.2.1. Forced light/dark test.

276 We investigated whether the behavioral effects of developmental exposure to nicotine and THC  
277 were similar to those of JWH-018. Exposure to 2  $\mu$ M THC led to impaired locomotion of larvae,  
278 similar to the effects observed for the JWH-018 treatment. Distances travelled over the course of the  
279 experiment were much shorter for THC treated larvae ( $M=0.62$ ,  $SE=0.02$ ) compared to controls  
280 ( $M=0.91$ ,  $SE=0.02$ ) [*Effect of THC treatment*:  $\chi^2(1)=120.89$ ,  $p<0.0001$ ]. The differences between treated vs  
281 control larvae were consistent for baseline, light and dark periods (Figure 4).

282 Treatment with 2  $\mu$ M THC also affected larvae recovery slopes during the first light period. Slopes  
283 for control larvae were steeper ( $M=0.02$ ,  $SE=0.006$ ) than for THC treated larvae ( $M=0.004$ ,  $SE=0.006$ ),  
284 suggesting that controls recovered faster and therefore THC may have an anxiogenic effect  
285 [ $F(1)=5.397$ ,  $p=0.0223$ ]. However, there were no significant differences between slopes of treated vs  
286 control larvae for the second light period ( $p>0.05$ ).



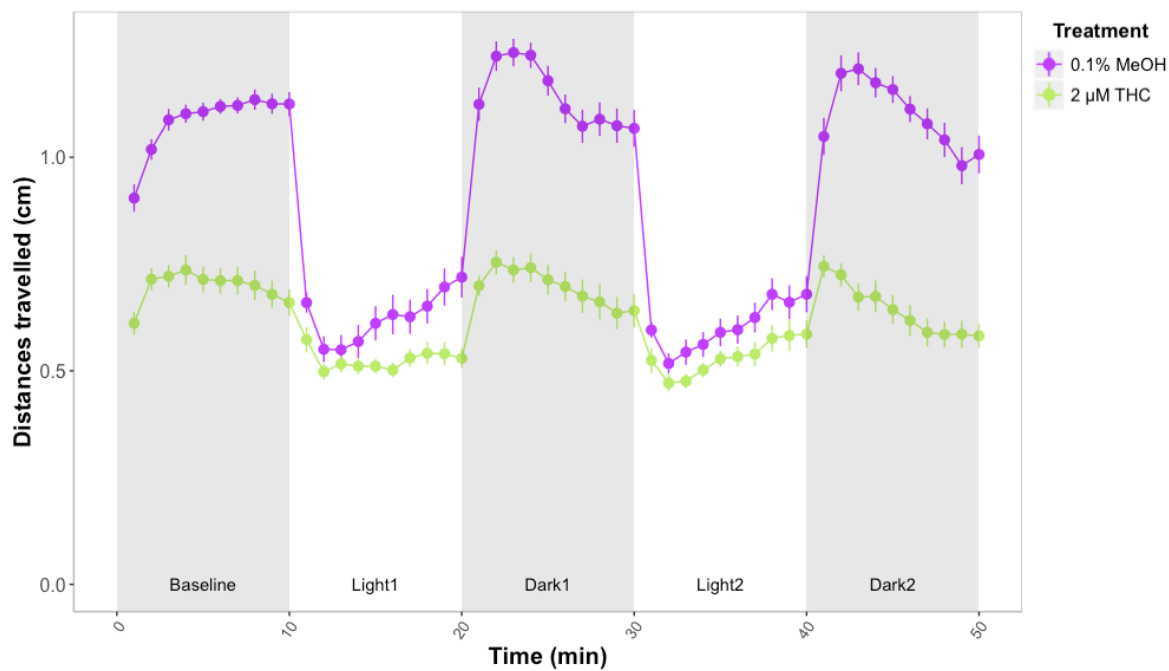

287

288 **Figure 4.** Forced light/dark test in wild type zebrafish exposed to 2 μM THC. Sample size: n=48 for  
289 each dose group. Each dot represents mean of the total distance travelled per minute. Error bars  
290 represent ±SEM.

291 In contrast to JWH-018 and THC, exposure to nicotine produced an increase in distances travelled.  
292 During the forced light/dark test, both time [ $\chi^2(1)=15.56$ ,  $p<0.0001$ ] and nicotine treatment [ $\chi^2$   
293 (1)=16.04,  $p<0.0001$ ] had a significant effect on the distance travelled over the course of the forced  
294 light/dark assay. Treatment with 0.15 μM nicotine increased the locomotor activity of larvae. The  
295 increased distances travelled by nicotine-treated larvae were significant for baseline, dark and light  
296 periods ( $p<0.0001$ ) (Figure 5).

297 There was a qualitative difference between control and treated zebrafish in the slopes during light  
298 periods, as nicotine-treated zebrafish seemed to recover faster, suggesting an anxiolytic effect of  
299 nicotine. However the difference between nicotine treated and control zebrafish was not significant  
300 [ $F(1)=3.18$ ,  $p=0.07$ ].

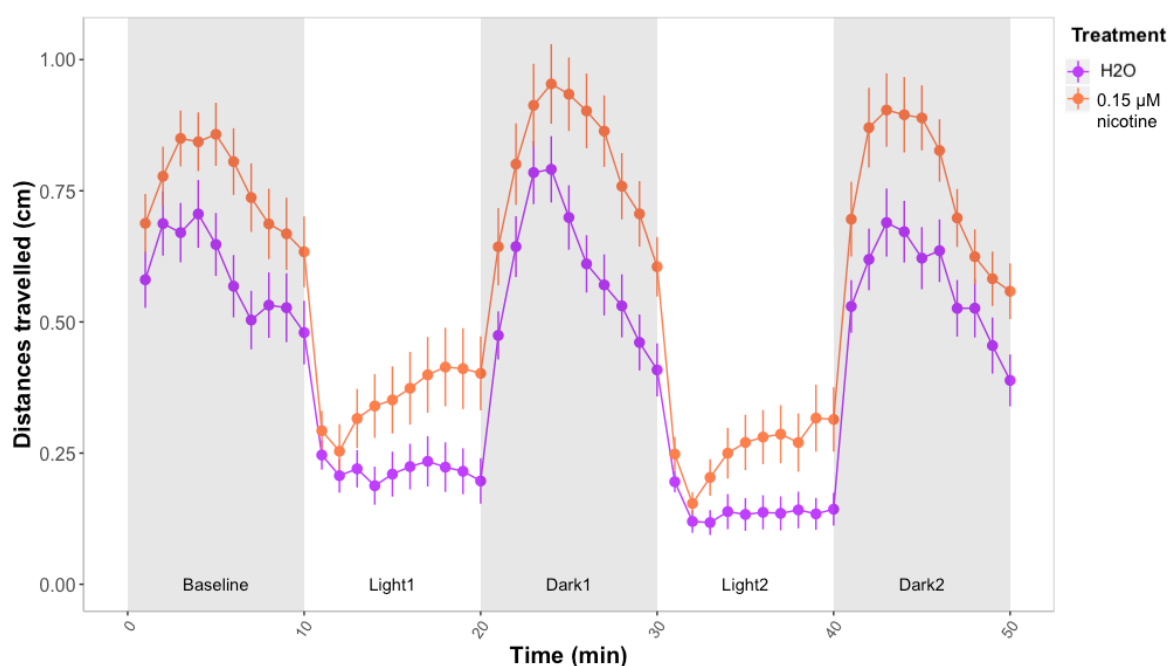

301

302 **Figure 5.** Forced light/dark test in wild type zebrafish exposed to 0.15  $\mu\text{M}$  nicotine. Sample size:  $n=48$   
303 for each dose group. Each dot represents mean of the total distance travelled per minute. Error bars  
304 represent  $\pm\text{SEM}$ .

305 3.2.2. Response to repeated sound/vibration stimuli.

306 Zebrafish larvae treated with 2  $\mu\text{M}$  THC were less active during the first 30 seconds of the experiment,  
307 before any stimuli was given [*Effect of THC treatment*:  $\chi^2(1)=15.31$ ,  $p<0.0001$ ]. However, during the ten  
308 sound/vibration stimuli larvae had similar locomotor activity ( $p>0.05$ ) (Figure 6).

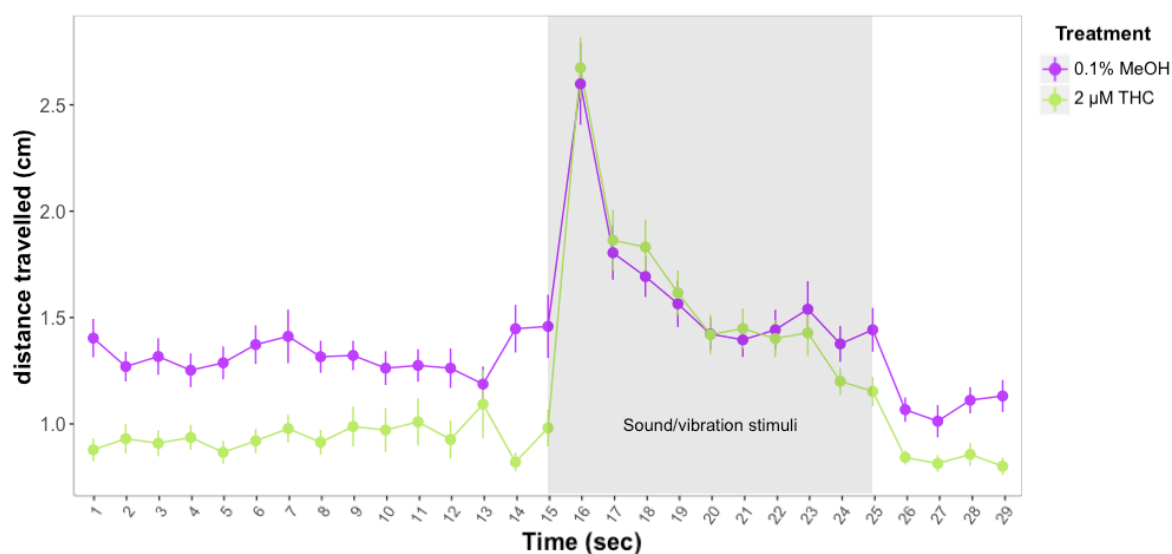

309

310 **Figure 6.** Distances travelled by control and THC treated larvae before and after exposure to 10  
311 sound/vibration stimuli. Figure shows mean distances travelled in one second time bins. Error bars  
312 represent  $\pm\text{SEM}$ . Sample sizes:  $n=48$  per dose group.

313 Similar to the response seen during the forced light/dark test, zebrafish treated with 0.15  $\mu$ M nicotine  
314 increased their locomotor response. The effect was significant during stimuli [ $\chi^2(1)=4.00$ ,  $p=0.04$ ], but  
315 not during the first 15 seconds before the stimuli ( $p>0.05$ ) (Figure 7).  
316

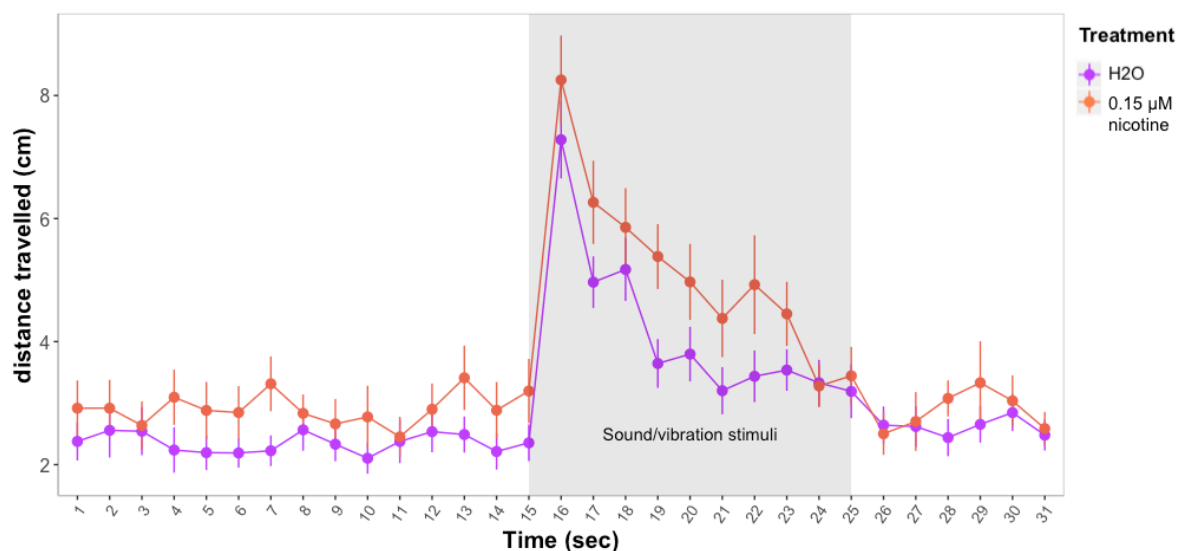

317  
318 **Figure 7.** Distances travelled by control and nicotine treated larvae before and after exposure to 10  
319 sound/vibration stimuli. Figure shows mean distances travelled in one second time bins. Error bars  
320 represent  $\pm$ SEM. Control:  $n=23$ , treated with 0.15  $\mu$ M nicotine:  $n=23$ .

### 321 3.3. Larval behavior during developmental exposure to JWH-018 in wild type and mutant *disc1* larvae

322 Similar to the results for the Tübingen larvae, over the 50 minutes of the forced light/dark test, JWH-  
323 018 treatment [ $\chi^2(1)=12.51$ ,  $p<0.0001$ ] and time [ $\chi^2(1)=72.83$ ,  $p<0.0001$ ] were significant predictors of  
324 distance travelled. Although *disc1* wild type larvae travelled longer distances than mutants, genotype  
325 effects were not significant [ $\chi^2(1)=4.9$ ,  $p=0.08$ ] (Figure 8).

326 During baseline, neither treatment nor genotype affected distances travelled ( $p>0.05$ ). During the  
327 dark periods, wild type and *disc1* homozygous (but not *disc1* heterozygous larvae) travelled shorter  
328 distances when exposed to JWH-018 [*Effect of JWH-018 treatment*:  $\chi^2(1)=16.17$ ,  $p<0.0001$ ].

329 During light periods, there was a main effect of JWH-018 treatment [ $\chi^2(1)=4.57$ ,  $p=0.032$ ]: larvae  
330 exposed to JWH-018 travelled shorter distances than control larvae. However, there were no  
331 significant main effects of *disc1* genotype, nor significant interactions between genotype and JWH-  
332 018 on distances travelled or on th slopes calculated during light periods.

333

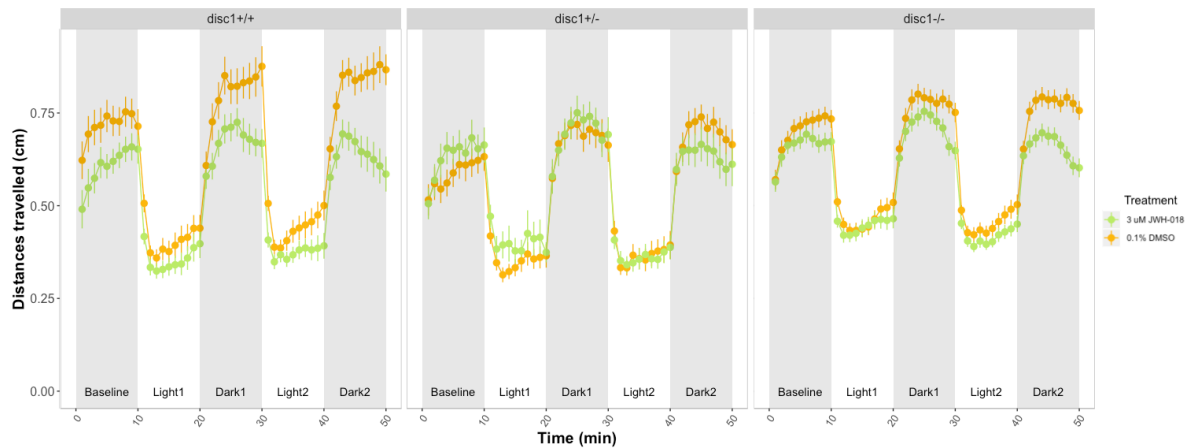

334  
335 **Figure 8.** Forced light/dark test in five dpf wild type and *disc1* loss-function mutant larvae. Sample  
336 sizes for each group: control *disc1* +/+ : n=30, JWH-018 *disc1* +/+ : n=34, control *disc1* +/- : n=33, JWH-018  
337 *disc1* +/- : n=27, control *disc1* -/- : n=107, JWH-018 *disc1* -/- : n=92. Each dot represents mean distance  
338 travelled per minute. Error bars represent ±SEM.

339 After 24 hours from the last JWH-018 drug refresh, treated and control larvae showed no significant  
340 differences in distances travelled before or during the startle stimuli. There were no significant  
341 differences across *disc1* genotype groups (Figure 9).

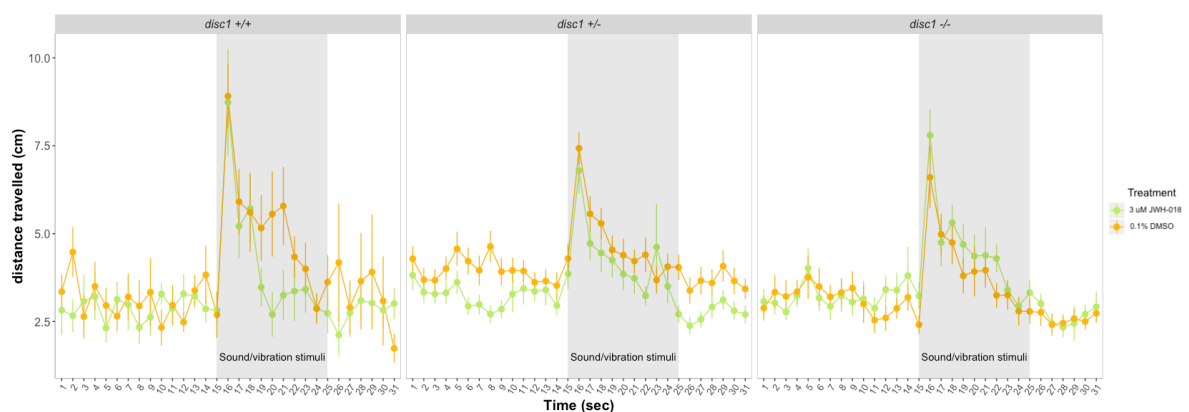

342  
343 **Figure 9.** Response and habituation to startle stimuli test in six dpf control and JWH-018 treated wild  
344 type and *disc1* mutant larvae. Sample sizes: control *disc1* +/+ : n=15, JWH-018 *disc1* +/+ : n=13, control  
345 *disc1* +/- : n=47, JWH-018 *disc1* +/- : n=47, control *disc1* -/- : n=22, JWH-018 *disc1* -/- : n=22.

#### 346 3.4. Adult behavior after developmental exposure to JWH-018 in wild type and mutant *disc1* zebrafish

347 The *disc1* genotype affected the behavioural response during the novel tank assay (Figure 10). Wild  
348 type zebrafish spent less time on the bottom of the tank than homozygous and heterozygous *disc1*  
349 mutants [*Effect of genotype*:  $\chi^2(14)=119.40$ ,  $p<0.0001$ ] (Figure 10-A). Distances travelled over the five  
350 minutes of the experiment were also different across *disc1* genotypes (Figure 10-B): while wild type  
351 zebrafish did not differ in the distance travelled over time, zebrafish heterozygous and homozygous  
352 for *disc1* moved less during the first minute, and increased later the distance travelled [*Effect of*  
353 *genotype by time interaction*:  $\chi^2(14)=18.15$ ,  $p=0.02$ ]. The number of transitions between the bottom and  
354 top area of the tank over the five minutes of the experiment remained similar for wild types but  
355 increased for heterozygous and homozygous zebrafish [*Effect of genotype by time interaction*:  $\chi^2$   
356 (8)=22.93,  $p<0.0001$ ] (Figure 10-C).

357 Developmental exposure to JWH-018 reduced the time spent on the bottom of the tank [*Effect of JWH-*  
 358 *018 treatment:  $\chi^2(1)=11.31, p<0.0001$ ]. The effect was stronger for wild type than for mutant zebrafish*  
 359 (Figure 10-A), but there were no significant genotype by JWH-018 treatment interactions ( $p>0.05$ ).  
 360 Developmental exposure to JWH-018 did not affect the distance travelled nor the number of  
 361 transitions between the top and bottom area of the tank for wild type and heterozygous *disc1*  
 362 zebrafish (Figure 10-B and C) ( $p>0.05$ ). For homozygous *disc1* zebrafish, treatment with JWH-018  
 363 decreased the number of top-bottom transitions but the interaction between genotype and JWH-018  
 364 treatment was not significant (Figure 10-C).

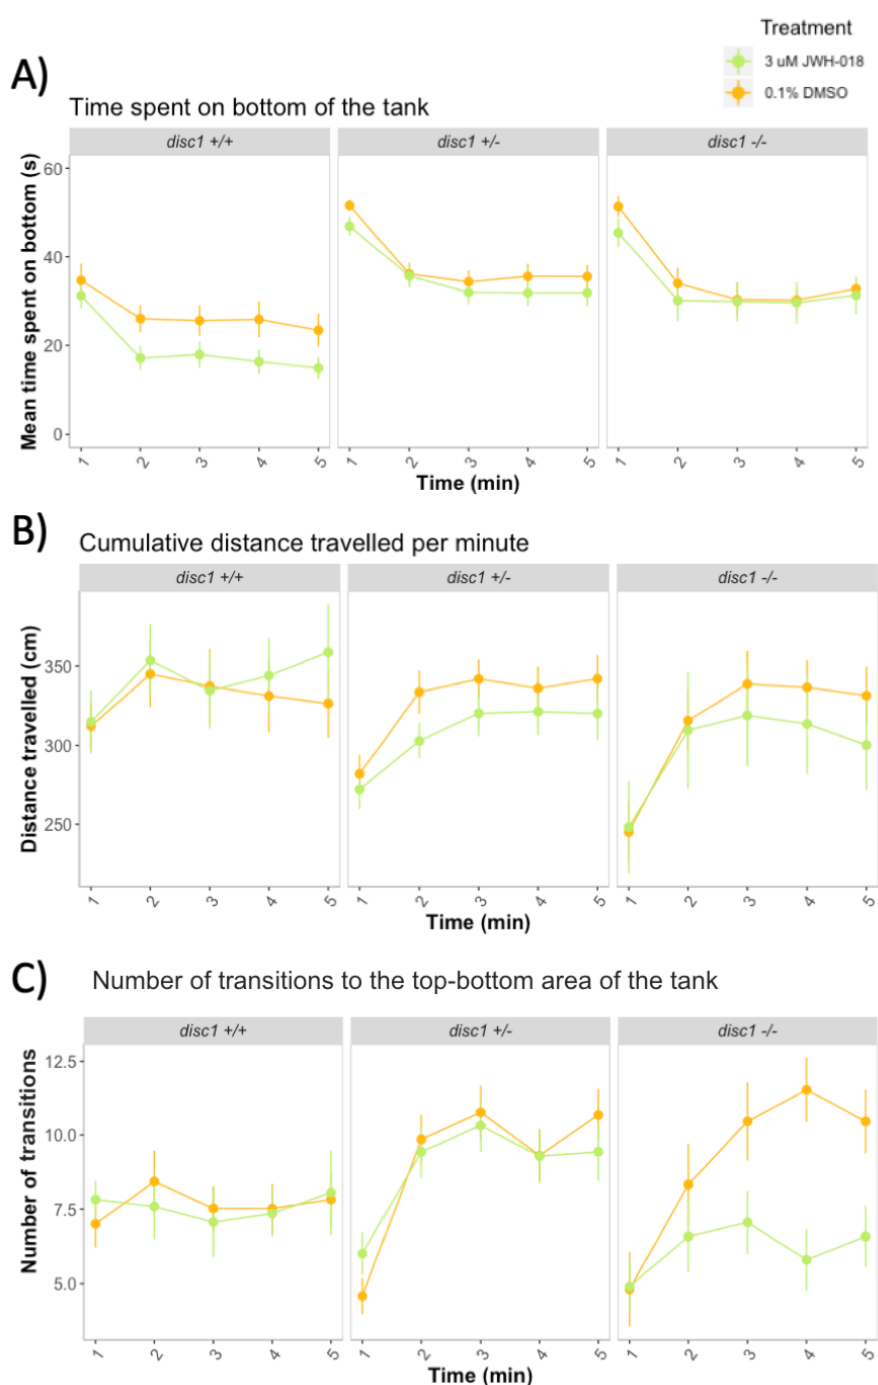

365

366 **Figure 10.** Novel tank diving response in adult wild type and mutant *disc1* zebrafish after  
 367 developmental exposure to 3 $\mu$ M JWH-018. Sample sizes for each group: control *disc1 +/+*: n=23, JWH-  
 368 018 *disc1 +/+*: n=17, control *disc1 +/-*: n=35, JWH-018 *disc1 +/-*: n=34, control *disc1 -/-*: n=15, JWH-018  
 369 *disc1 -/-*: n=19. Error bars represent  $\pm$ SEM.



#### 370 4. Discussion

371 This study used zebrafish as an animal model to investigate the behavioral effects of developmental  
372 exposure to JWH-018, the main psychoactive compound of synthetic cannabinoids. Zebrafish larvae  
373 exposed to JWH-18 had impaired locomotor response during the forced light/dark test but their  
374 anxiety levels and response to repeated sound/vibration stimuli were not altered. We then  
375 interrogated whether the behavioral effects of developmental exposure to JWH-018 were exacerbated  
376 by loss-of-function mutations in *disc1*, an important gene for neurodevelopment with a potential role  
377 in the cannabinoid system. Loss-of-function in *disc1* increased zebrafish anxiety but did not moderate  
378 sensitivity to the effects of JWH-018.

379  
380 Alterations in the typical response to light and dark periods can be used to study the anxiety-like  
381 response in zebrafish. Others have interpreted the distance travelled in the dark period immediately  
382 following light exposure as a measure of anxiety -the greater the distance moved, the more anxious  
383 [40]. However, this interpretation is usually applied when using shorter light exposures (50 seconds)  
384 and is problematic when there are clear effects on locomotion. In this study, we examined the slopes  
385 during light periods, which represent how quickly zebrafish larvae recover from a startle stimulus  
386 (i.e. bright light) and provide a measure of stress and anxiety less biased by locomotor effects. Our  
387 results show developmental exposure to JWH-018 did not affect the recovery during light, suggesting  
388 no effects of JWH-018 on anxiety. By contrast, larvae exposed to THC recovered slower -suggesting  
389 an anxiogenic effect of THC, and larvae exposed to nicotine tended to recover faster -suggesting an  
390 anxiolytic effect of nicotine. Both THC and nicotine were used as positive controls, and our results  
391 are consistent with previous studies of the novel tank diving response in adult zebrafish: compared  
392 to controls, animals pre-exposed to THC spent more time on the bottom of the tank, consistent with  
393 an anxiogenic effect [41], whereas animals pre-exposed to nicotine spent less time on the bottom of  
394 the tank, consistent with an anxiolytic effect [42]. Since both THC and JWH-018 are cannabinoids, the  
395 difference in their behavioral impact is of interest. Differences in pharmacological properties (JWH-  
396 018 is a full CB1/CB2 agonist, whereas THC is a CB1 partial agonist) or pharmacokinetic warrant  
397 further investigation.

398 In addition to the anxiety-like behaviors, the stimulatory and depressant responses elicited by  
399 neuroactive drugs used by humans can be modeled in zebrafish larvae. For example, exposure to  
400 adrenaline -a neuro-stimulant- increased the locomotor activity in the forced light/dark test, whereas  
401 tricaine -a CNS depressant- decreased it [43]. In this study, we show developmental exposure to JWH-  
402 018 reduced the locomotor activity of five dpf wild type zebrafish during dark periods in the forced  
403 light/dark test. The effects of JWH-018 were similar to the effects of THC but opposite to the effects  
404 of nicotine. The results for THC and nicotine are in line with previous studies showing a reduction  
405 in locomotion after exposure to THC [30], and an increase in locomotion after exposure to nicotine  
406 [44]. We hypothesize that cannabinoids may produce a CNS depressant effect, whereas exposure to  
407 nicotine enhances the behavioral stimulant effects of nicotine in zebrafish larvae. However, we cannot  
408 rule out that these drugs affected zebrafish behavior via impairment /activation of motor neurons or  
409 toxicity effects [45].

410 When anxiety-like behavior was assessed during adulthood, we observed wild-type zebrafish  
411 developmentally exposed to JWH-018 spent less time on the bottom of the tank, suggesting they were  
412 less anxious when placed in a new environment compared to non-exposed animals. These results  
413 challenge previous reports suggesting anxiogenic effects due to drug withdrawal in zebrafish [46,47].  
414 However, none of these studies exposed fish to JWH-018, nor they exposed them at early  
415 developmental stages and tested months after withdrawal, limiting their comparability. In our study,  
416 exposure to JWH-018 started at 24 hours post fertilization, a period in which the main zebrafish brain  
417 structures (i.e. forebrain, midbrain, and hindbrain) are formed, but finer structures are still to be  
418 defined [48]. It is possible that exposures at such early ages lead to persistent adaptive changes in  
419 gene expression and neurotransmission different from the adaptive mechanisms happening during

420 other developmental periods -such as adolescence-, which in turn may lead to different alterations in  
421 the anxiety-like responses in zebrafish in later life.

422 Adult zebrafish with loss-of-function mutations in *disc1* showed increased anxiety-like responses  
423 compared to wild types. These results are in line with another study showing abnormal stress  
424 response in this mutant line [49] and support the role of *disc1* in zebrafish HPI axis function [49].  
425 Previous research in zebrafish have shown that alterations in *disc1* causes alterations in the  
426 specification of oligodendrocytes and neurons [50], and in the migration and differentiation of the  
427 neural crest (the cells that form the craniofacial cartilage and connective tissue of the head) [51].  
428 Alterations in those processes could also underlie the alterations in behavior we observed. DISC1 is  
429 a scaffolding protein that interacts with many other proteins and regulates the formation,  
430 maintenance and correct regulation of neural networks [15]. Given the number of interacting  
431 proteins, the specific biological mechanisms by which DISC1 acts is a complex question out of the  
432 scope of this study. However, this work paves the way to using zebrafish as a legitimate model in  
433 which to investigate the role of DISC1 in stress and neurodevelopment.

434  
435 We showed no evidence of *disc1* altering sensitivity to the effects of JWH-018, as the effects of JWH-  
436 018 were less appreciable in mutant zebrafish but did not reach statistical significance. These findings  
437 are in contrast with studies in mice reporting synergistic effects between THC and alterations in  
438 *Disc1*. However, disparities in the psychoactive compound (JWH-018 vs THC), in the age of exposure  
439 (early brain development vs adolescence), and in the animal model used (zebrafish vs rodents) may  
440 underlie those differences. Further work using different species is needed to replicate our findings.

441 There were no differences in larval behavior across *disc1* genotype groups with or without exposure  
442 to JWH-018. Interestingly, the behavioral pattern of the Tübingen wild types and the *disc1* wild type  
443 larvae in the forced light/dark test was different. Since they belonged to different zebrafish strains  
444 (Tübingen vs AB), differences may be due to their genetic background. Given the small sample sizes  
445 of the *disc1* wild type and homozygous groups (n=15-22) and the high variability in the larval  
446 behavioral responses, caution is needed before drawing strong conclusions resulting from the *disc1*  
447 larval tests as well as its comparison with the Tübingen wild types. *disc1* mutant zebrafish did not  
448 breed well: They laid less often and produced a low number of eggs, usually unfertilized. We had to  
449 perform five independent experiments and combine the results to increase the sample size, at the cost  
450 of adding experimental variation to our results. Although care was taken to ensure that time of drug  
451 exposure prior to testing, time of behavioral testing, and developmental stages were similar across  
452 experiments, these experimental parameters are known to affect zebrafish behavior [52].

453 JWH-018 did not affect the behavioral response of zebrafish larvae at six dpf. To maintain a gap of 48  
454 hours between each refresh, we did not refresh the drug prior testing at this age, and therefore the  
455 absence of behavioral phenotype could be due to (1) JWH-018 metabolizes very quickly and there  
456 was no accumulation in the larvae, so after 24 hours there was no noticeable effects or (2) JWH-018  
457 oxidates very quickly in water and its psychotropic properties were lost after a few hours in the water.  
458 In order to disentangle these scenarios, liquid chromatography-mass spectrometry analyses could be  
459 used to measure the concentrations of the drug in the water and in zebrafish tissue. It is also possible  
460 that the repeated administration of JWH-018 produced tolerance to behavioral effects in zebrafish  
461 larvae, since it has been shown that in rodents, repeated injection of similar doses of JWH-018  
462 produced tolerance to its hypothermic and cataleptic effects [32]. Future studies where the behavioral  
463 effect of repeated vs single exposures are compared would be valuable to examine the tolerance of  
464 different drugs.

## 465 5. Conclusions

466 This is the first study looking at the behavioral effects of early developmental exposure to JWH-018  
467 and the interaction with loss-of-function mutations in *disc1*. Our results suggest that exposure to  
468 drugs of abuse during early-development leads to long-term behavioral changes in zebrafish.

469 However, further studies in human populations and other models are needed to confirm these  
470 findings. Our results align with previous research suggesting that functional abnormalities in DISC1  
471 has a behavioral impact, and report no evidence of synergistic effect between developmental  
472 exposure to JWH-018 and *disc1*. These results pave the way to study molecular mechanisms by which  
473 *disc1* and developmental exposure to JWH-018 act, and give little evidence for interaction between  
474 *disc1* and developmental exposure to synthetic cannabinoids.

475  
476

477 **Supplementary Materials:** Figure S1: Response and habituation to startle stimuli test with different  
478 interstimulus intervals (ISI) in wild type zebrafish larvae, Figure S2: Tank used for novel tank diving assay.

479 **Author Contributions:** Conceptualization, C.H.B.; methodology, C.H.B., B.D.Q., A.J.B. and J.G.G.; formal  
480 analysis, B.D.Q. A.J.B. and J.G.G.; investigation, C.H.B. and J.G.G.; resources, C.H.B.; writing—original draft  
481 preparation, C.H.B. and J.G.G.; writing—review and editing, C.H.B. and J.G.G.; visualization, J.G.G.;  
482 supervision, C.H.B.; project administration, C.H.B.; funding acquisition, C.H.B.. All authors have read and  
483 agreed to the published version of the manuscript.

484 **Funding:** This research was funded by NC3Rs G1000053 (CHB); BBSRC BB/M007863 (CHB); NIH U01  
485 DA044400-03 (CHB) and QMUL (JGG). CHB is a member of the Royal Society Industry Fellows' College.

486 **Acknowledgments:** We thank Mr Luca Galantini for the assistance in animal maintenance and Miss Aida Kafai  
487 Golahmadi for preliminary work on the effects of JWH-018 on zebrafish.

488 **Conflicts of Interest:** The authors declare no conflict of interest.

489

490 SUPPLEMENTARY MATERIAL AND APPENDICES A-B

491

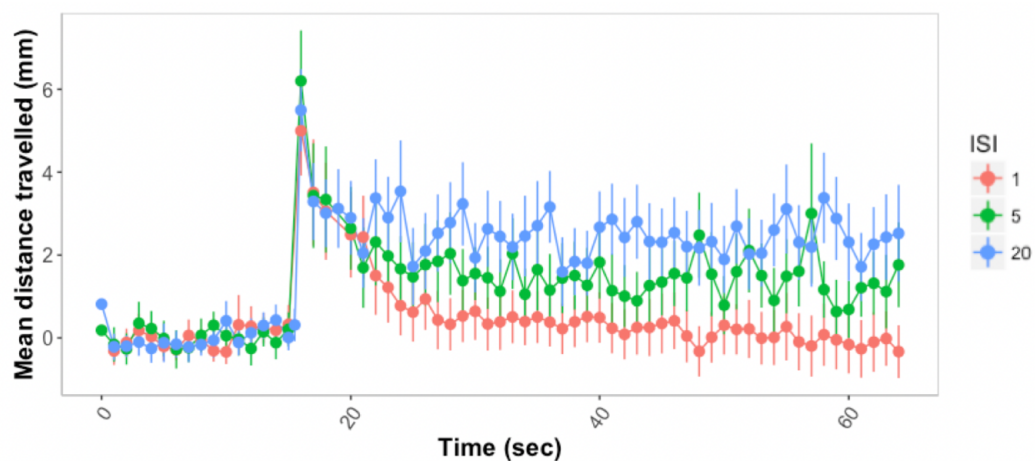

492

493 **Figure S1.** Response and habituation to startle stimuli test with different interstimulus intervals (ISI)

494 in wild type zebrafish larvae. The first stimulus is given at second 15.

495

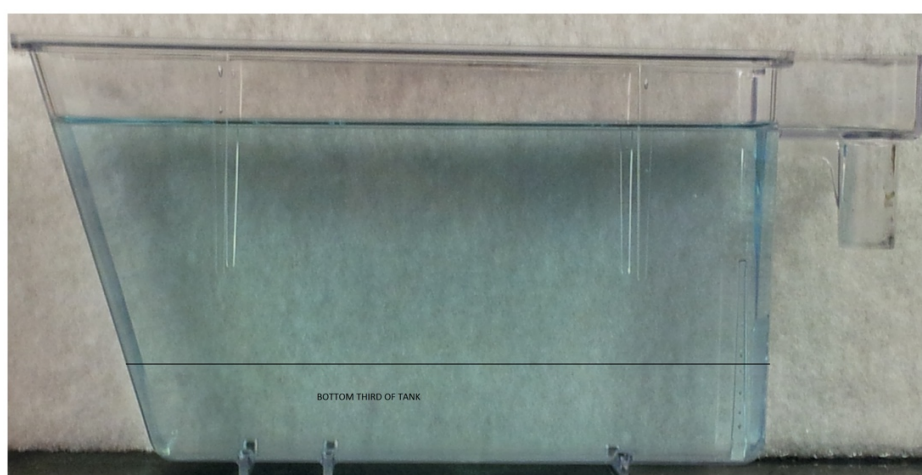

496

497 **Figure S2.** Tank used for novel tank diving assay.



498 **Appendix A: Developmental exposure to 0.15  $\mu$ M nicotine from two to seven dpf lead to an**  
499 **increase in nicotine preference when fish were adults (~four months old) and conditioned to 5**  
500  **$\mu$ M nicotine.**

501 Drug-induced reinforcement of behavior, that reflects the hedonic value of drugs of abuse including  
502 nicotine, is highly conserved in both mammalian and non-mammalian species [28,53–55].  
503 Conditioned place preference (CPP), where drug exposure is paired with specific environmental  
504 cues, is commonly used as a measure of drug-induced reinforcement and reward [56]. Previous  
505 studies have shown that zebrafish show a robust CPP to nicotine [57–60].

506 Here, we show developmental exposure to 0.15  $\mu$ M nicotine lead to altered sensitivity of the drug-  
507 induced reinforcement and reward as measured in CPP (See [57] for methodology on the CPP assay).  
508 Fish that were not developmentally treated with nicotine showed a small increase in preference when  
509 conditioned with 5  $\mu$ M nicotine. By contrast, fish exposed to 0.15  $\mu$ M nicotine from two to seven days  
510 showed an increased change in preference [Interaction between CPP condition and developmental  
511 exposure:  $F(1,73)=4.482$ ,  $p=0.038$ ] (Figure S3).

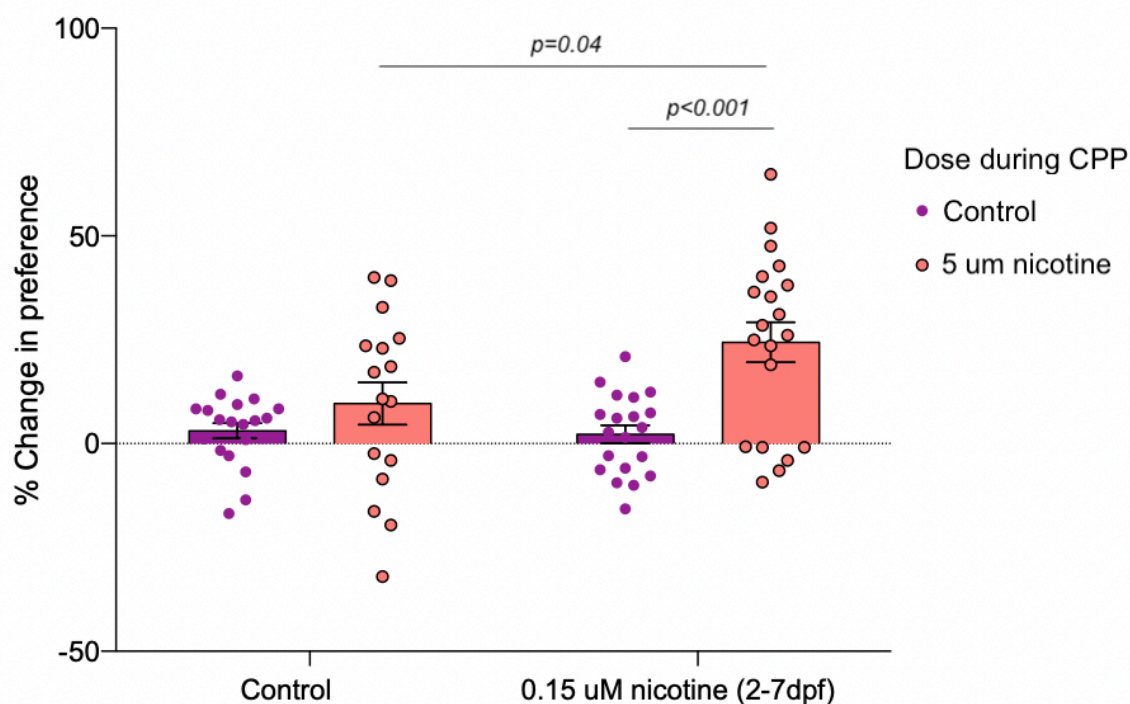

512

513 **Figure S3.** 5  $\mu$ M nicotine-induced place preference in adult zebrafish is exacerbated by  
514 developmental exposure to 0.15  $\mu$ M nicotine (from 2-7 dpf).  $n=17$  to 20 fish per experimental group.

515



## 516 **Appendix B: Behavioral assays data analysis**

### 517 *Data analysis for forced/light Dark test*

518 Firstly, we performed an overall analysis to identify the experimental variables that were significant  
519 predictors of distance travelled during the whole duration of the experiment (50 minutes). We fitted  
520 the data to a linear mixed model with total distance travelled as response variable, experimental  
521 variables (e.g. genotype, dose, time) as fixed effects, and fish ID as random effects.

522 We then created three subsets of the experiment: baseline, dark, and light periods. We analyzed each  
523 subset separately by fitting the data to linear mixed models as previously described. To assess  
524 differences between the first and second light periods, and between the first and second dark periods,  
525 we added the period number as fixed effect in the linear mixed models.

526 Linear mixed models were calculated using the R package lme4 [61]. To identify significant fixed  
527 effects, we calculated Analysis of Deviance Tables (Type II Wald  $\chi^2$  tests) for the models using the R  
528 package 'car' [62]. Where significant differences were established, we carried out post-hoc Tukey  
529 tests with the R package 'emmeans' [63] to further characterize the effects.

530 Larvae usually increased the distance travelled during the course of the light periods. To further  
531 explore this behavior, we calculated linear models for each zebrafish at each light period using  
532 distance travelled as response variable and time as independent variable. In these linear models, the  
533  $\beta$  coefficient for time represents the increase in distance travelled over time, and can be interpreted  
534 as the larva 'recovery rate'. We constructed ANOVA models (R function 'aov') to assess what  
535 variables were significant predictors of the 'recovery rate'.

### 536 *Data analysis for Habituation to startle response*

537 We firstly investigated larvae spontaneous locomotion by testing whether distances travelled before  
538 the stimuli differed across experimental groups. We then investigated larvae startle responses by  
539 testing whether distances travelled during the stimuli differed across experimental groups. In both  
540 analyses, we fitted the data to linear mixed models using the R package lme4 [61], with total distance  
541 travelled as response variable, experimental variables (e.g. genotype, dose, time) as fixed effects, and  
542 fish ID as random effects.

### 543 *Data analysis for novel tank diving*

544 To analyze genotype and/or treatment differences in the *time that zebrafish spent on the bottom* of the  
545 tank, we performed beta regressions using the R package 'betareg' [64]. We used beta regression  
546 because proportion time spent on the bottom of the tank was used as response variable. Proportion  
547 data is bounded by the interval [0, 1] and often exhibits heterogeneity in variance, which violates  
548 statistical assumptions used by linear models [64].

549 To analyze genotype or treatment differences in the *total distance* that zebrafish travelled in the tank,  
550 we fitted the data to a linear mixed model with the total distance travelled during one minute as  
551 response variable, time, genotype and/or treatment as fixed effects, and fish ID as random effects.

552 To analyze genotype or treatment differences in the *number of transitions* that zebrafish made between  
553 the top and the bottom of the tank, we fitted the data to a generalized linear mixed model with  
554 Poisson distribution. The Poisson distributions is commonly used when the response variable is  
555 count data [65]. We used the number of transitions to the top-bottom of the tank response variable,  
556 time, genotype or/and treatment as fixed effects, and fish ID as random effects.

557 Experiments were replicated on different days, and data was jointly analyzed afterwards. Mixed  
558 models were calculated using the R package lme4 [61]. To identify experimental variables with  
559 significant effects, we calculated Analysis of Deviance Tables (Type II Wald  $\chi^2$  tests) for the models  
560 using the R package `car` [62]. Where significant differences were established, we carried out post-  
561 hoc Tukey tests with the R package `emmeans` [63] to further characterize the effects.

562

## 563 References

- 564 1. NHS digital Statistics on Smoking, England 2019 Available online:  
565 <https://www.gov.uk/government/statistics/statistics-on-smoking-england-2019> (accessed on  
566 Jan 31, 2020).
- 567 2. Young-Wolff, K.C.; Tucker, L.-Y.; Alexeeff, S.; Armstrong, M.A.; Conway, A.; Weisner, C.;  
568 Goler, N. Trends in Self-reported and Biochemically Tested Marijuana Use Among Pregnant  
569 Females in California From 2009-2016. *JAMA* **2017**, *318*, 2490–2491, doi:10.1001/jama.2017.17225.
- 570 3. Jaques, S.C.; Kingsbury, A.; Henschke, P.; Chomchai, C.; Clews, S.; Falconer, J.; Abdel-Latif,  
571 M.E.; Feller, J.M.; Oei, J.L. Cannabis, the pregnant woman and her child: weeding out the myths.  
572 *J Perinatol* **2014**, *34*, 417–424, doi:10.1038/jp.2013.180.
- 573 4. Fride, E. The endocannabinoid-CB receptor system: Importance for development and in  
574 pediatric disease. *Neuro Endocrinol. Lett.* **2004**, *25*, 24–30.
- 575 5. Castaneto, M.S.; Gorelick, D.A.; Desrosiers, N.A.; Hartman, R.L.; Pirard, S.; Huestis, M.A.  
576 Synthetic cannabinoids: Epidemiology, pharmacodynamics, and clinical implications. *Drug &*  
577 *Alcohol Dependence* **2014**, *144*, 12–41, doi:10.1016/j.drugalcdep.2014.08.005.
- 578 6. Loeffler, G.; Delaney, E.; Hann, M. International trends in spice use: Prevalence, motivation for  
579 use, relationship to other substances, and perception of use and safety for synthetic  
580 cannabinoids. *Brain Res. Bull.* **2016**, *126*, 8–28, doi:10.1016/j.brainresbull.2016.04.013.
- 581 7. Wiley, J.L.; Compton, D.R.; Dai, D.; Lainton, J.A.; Phillips, M.; Huffman, J.W.; Martin, B.R.  
582 Structure-activity relationships of indole- and pyrrole-derived cannabinoids. *J. Pharmacol. Exp.*  
583 *Ther.* **1998**, *285*, 995–1004.
- 584 8. Wiley, J.L.; Marusich, J.A.; Martin, B.R.; Huffman, J.W. 1-Pentyl-3-phenylacetylindoles and  
585 JWH-018 share in vivo cannabinoid profiles in mice. *Drug Alcohol Depend* **2012**, *123*, 148–153,  
586 doi:10.1016/j.drugalcdep.2011.11.001.
- 587 9. Atwood, B.K.; Lee, D.; Straiker, A.; Widlanski, T.S.; Mackie, K. CP47,497-C8 and JWH073,  
588 commonly found in 'Spice' herbal blends, are potent and efficacious CB1 cannabinoid receptor  
589 agonists. *Eur J Pharmacol* **2011**, *659*, 139–145, doi:10.1016/j.ejphar.2011.01.066.
- 590 10. Järbe, T.U.C.; Deng, H.; Vadivel, S.K.; Makriyannis, A. Cannabinergic aminoalkylindoles,  
591 including AM678=JWH018 found in "Spice", examined using drug ( $\Delta(9)$ -tetrahydrocannabinol)  
592 discrimination for rats. *Behav Pharmacol* **2011**, *22*, 498–507, doi:10.1097/FBP.0b013e328349fbd5.
- 593 11. Ginsburg, B.C.; Schulze, D.R.; Hrubá, L.; McMahon, L.R. JWH-018 and JWH-073:  $\Delta 9$ -  
594 Tetrahydrocannabinol-Like Discriminative Stimulus Effects in Monkeys. *J Pharmacol Exp Ther*  
595 **2012**, *340*, 37–45, doi:10.1124/jpet.111.187757.
- 596 12. Tait, R.J.; Caldicott, D.; Mountain, D.; Hill, S.L.; Lenton, S. A systematic review of adverse events  
597 arising from the use of synthetic cannabinoids and their associated treatment. *Clinical Toxicology*  
598 **2016**, *54*, 1–13, doi:10.3109/15563650.2015.1110590.
- 599 13. Theunissen, E.L.; Hutten, N.R.P.W.; Mason, N.L.; Toennes, S.W.; Kuypers, K.P.C.; de Sousa  
600 Fernandes Perna, E.B.; Ramaekers, J.G. Neurocognition and subjective experience following  
601 acute doses of the synthetic cannabinoid JWH-018: a phase 1, placebo-controlled, pilot study.  
602 *Br. J. Pharmacol.* **2018**, *175*, 18–28, doi:10.1111/bph.14066.
- 603 14. Carlier, J.; Huestis, M.A.; Zaami, S.; Pichini, S.; Busardò, F.P. Monitoring the effects of perinatal  
604 cannabis and synthetic cannabinoid exposure. *Therapeutic Drug Monitoring* **2019**, *Publish Ahead*  
605 *of Print*, doi:10.1097/FTD.0000000000000667.

- 606 15. Brandon, N.J.; Sawa, A. Linking neurodevelopmental and synaptic theories of mental illness  
607 through DISC1. *Nat. Rev. Neurosci.* **2011**, *12*, 707–722, doi:10.1038/nrn3120.
- 608 16. Jacobs, P.A.; Brunton, M.; Frackiewicz, A.; Newton, M.; Cook, P.J.L.; Robson, E.B. Studies on a  
609 family with three cytogenetic markers. *Annals of Human Genetics* **1970**, *33*, 325–336,  
610 doi:10.1111/j.1469-1809.1970.tb01658.x.
- 611 17. Blackwood, D.H.R.; Fordyce, A.; Walker, M.T.; St. Clair, D.M.; Porteous, D.J.; Muir, W.J.  
612 Schizophrenia and Affective Disorders—Cosegregation with a Translocation at Chromosome  
613 1q42 That Directly Disrupts Brain-Expressed Genes: Clinical and P300 Findings in a Family. *Am*  
614 *J Hum Genet* **2001**, *69*, 428–433.
- 615 18. Sachs, N.A.; Sawa, A.; Holmes, S.E.; Ross, C.A.; DeLisi, L.E.; Margolis, R.L. A frameshift  
616 mutation in Disrupted in Schizophrenia 1 in an American family with schizophrenia and  
617 schizoaffective disorder. *Mol. Psychiatry* **2005**, *10*, 758–764, doi:10.1038/sj.mp.4001667.
- 618 19. Thomson, P.; Malavasi, E.L.V.; Grunewald, E.; Soares, D.C.; Borkowska, M.; Millar, J.K. DISC1  
619 genetics, biology and psychiatric illness. *Front Biol (Beijing)* **2013**, *8*, 1–31, doi:10.1007/s11515-  
620 012-1254-7.
- 621 20. Ballinger, M.D.; Saito, A.; Abazyan, B.; Taniguchi, Y.; Huang, C.-H.; Ito, K.; Zhu, X.; Segal, H.;  
622 Jaaro-Peled, H.; Sawa, A.; et al. Adolescent cannabis exposure interacts with mutant DISC1 to  
623 produce impaired adult emotional memory. *Neurobiol Dis* **2015**, *82*, 176–184,  
624 doi:10.1016/j.nbd.2015.06.006.
- 625 21. Jouroukhin, Y.; Zhu, X.; Shevelkin, A.V.; Hasegawa, Y.; Abazyan, B.; Saito, A.; Pevsner, J.;  
626 Kamiya, A.; Pletnikov, M.V. Adolescent  $\Delta$ 9-Tetrahydrocannabinol Exposure and Astrocyte-  
627 Specific Genetic Vulnerability Converge on Nuclear Factor- $\kappa$ B-Cyclooxygenase-2 Signaling to  
628 Impair Memory in Adulthood. *Biol. Psychiatry* **2019**, *85*, 891–903,  
629 doi:10.1016/j.biopsych.2018.07.024.
- 630 22. Ross, E.J.; Graham, D.L.; Money, K.M.; Stanwood, G.D. Developmental Consequences of Fetal  
631 Exposure to Drugs: What We Know and What We Still Must Learn. *Neuropsychopharmacology*  
632 **2015**, *40*, 61–87, doi:10.1038/npp.2014.147.
- 633 23. Kalueff, A.V.; Stewart, A.M.; Gerlai, R. Zebrafish as an emerging model for studying complex  
634 brain disorders. *Trends Pharmacol Sci* **2014**, *35*, 63–75, doi:10.1016/j.tips.2013.12.002.
- 635 24. Clark, K.J.; Boczek, N.J.; Ekker, S.C. Stressing Zebrafish for Behavioral Genetics. *Rev Neurosci*  
636 **2011**, *22*, 49–62, doi:10.1515/RNS.2011.007.
- 637 25. Egan, R.J.; Bergner, C.L.; Hart, P.C.; Cachat, J.M.; Canavello, P.R.; Elegante, M.F.; Elkhayat, S.I.;  
638 Bartels, B.K.; Tien, A.K.; Tien, D.H.; et al. Understanding behavioral and physiological  
639 phenotypes of stress and anxiety in zebrafish. *Behav Brain Res* **2009**, *205*, 38–44,  
640 doi:10.1016/j.bbr.2009.06.022.
- 641 26. Bossé, G.D.; Peterson, R.T. Development of an opioid self-administration assay to study drug  
642 seeking in zebrafish. *Behavioural Brain Research* **2017**, *335*, 158–166, doi:10.1016/j.bbr.2017.08.001.
- 643 27. Iacono, W.G. Endophenotypes in psychiatric disease: prospects and challenges. *Genome Med*  
644 **2018**, *10*, doi:10.1186/s13073-018-0526-5.
- 645 28. Brennan, C.H.; Parker, M.O. Zebrafish (*Danio rerio*) models of substance abuse: Harnessing the  
646 capabilities. *Behaviour* **2012**, *149*, 1037–1062, doi:10.1163/1568539X-00003010.

- 647 29. De Rienzo, G.; Bishop, J.A.; Mao, Y.; Pan, L.; Ma, T.P.; Moens, C.B.; Tsai, L.-H.; Sive, H. Disc1  
648 regulates both  $\beta$ -catenin-mediated and noncanonical Wnt signaling during vertebrate  
649 embryogenesis. *The FASEB Journal* **2011**, *25*, 4184–4197, doi:10.1096/fj.11-186239.
- 650 30. Achenbach, J.C.; Hill, J.; Hui, J.P.M.; Morash, M.G.; Berrue, F.; Ellis, L.D. Analysis of the Uptake,  
651 Metabolism, and Behavioral Effects of Cannabinoids on Zebrafish Larvae. *Zebrafish* **2018**, *15*,  
652 349–360, doi:10.1089/zeb.2017.1541.
- 653 31. De Luca, M.A.; Bimpisidis, Z.; Melis, M.; Marti, M.; Caboni, P.; Valentini, V.; Margiani, G.;  
654 Pintori, N.; Polis, I.; Marsicano, G.; et al. Stimulation of in vivo dopamine transmission and  
655 intravenous self-administration in rats and mice by JWH-018, a Spice cannabinoid.  
656 *Neuropharmacology* **2015**, *99*, 705–714, doi:10.1016/j.neuropharm.2015.08.041.
- 657 32. Elmore, J.S.; Baumann, M.H. Repeated Exposure to the “Spice” Cannabinoid JWH-018 Induces  
658 Tolerance and Enhances Responsiveness to 5-HT<sub>1A</sub> Receptor Stimulation in Male Rats. *Front*  
659 *Psychiatry* **2018**, *9*, doi:10.3389/fpsy.2018.00055.
- 660 33. Irons, T.D.; MacPhail, R.C.; Hunter, D.L.; Padilla, S. Acute neuroactive drug exposures alter  
661 locomotor activity in larval zebrafish. *Neurotoxicol Teratol* **2010**, *32*, 84–90,  
662 doi:10.1016/j.ntt.2009.04.066.
- 663 34. Glazer, L.; Hawkey, A.B.; Wells, C.N.; Drastal, M.; Odamah, K.-A.; Behl, M.; Levin, E.D.  
664 Developmental Exposure to Low Concentrations of Organophosphate Flame Retardants  
665 Causes Life-Long Behavioral Alterations in Zebrafish. *Toxicol Sci* **2018**, *165*, 487–498,  
666 doi:10.1093/toxsci/kfy173.
- 667 35. Burgess, H.A.; Granato, M. Sensorimotor gating in larval zebrafish. *J. Neurosci.* **2007**, *27*, 4984–  
668 4994, doi:10.1523/JNEUROSCI.0615-07.2007.
- 669 36. Rankin, C.H.; Abrams, T.; Barry, R.J.; Bhatnagar, S.; Clayton, D.; Colombo, J.; Coppola, G.;  
670 Geyer, M.A.; Glanzman, D.L.; Marsland, S.; et al. Habituation Revisited: An Updated and  
671 Revised Description of the Behavioral Characteristics of Habituation. *Neurobiol Learn Mem* **2009**,  
672 *92*, 135–138, doi:10.1016/j.nlm.2008.09.012.
- 673 37. Quednow, B.B.; Wagner, M.; Westheide, J.; Beckmann, K.; Bliesener, N.; Maier, W.; Kühn, K.-U.  
674 Sensorimotor gating and habituation of the startle response in schizophrenic patients randomly  
675 treated with amisulpride or olanzapine. *Biol. Psychiatry* **2006**, *59*, 536–545,  
676 doi:10.1016/j.biopsych.2005.07.012.
- 677 38. Best, J.D.; Berghmans, S.; Hunt, J.J.F.G.; Clarke, S.C.; Fleming, A.; Goldsmith, P.; Roach, A.G.  
678 Non-associative learning in larval zebrafish. *Neuropsychopharmacology* **2008**, *33*, 1206–1215,  
679 doi:10.1038/sj.npp.1301489.
- 680 39. Parker, M.O.; Millington, M.E.; Combe, F.J.; Brennan, C.H. Housing conditions differentially  
681 affect physiological and behavioural stress responses of zebrafish, as well as the response to  
682 anxiolytics. *PLoS ONE* **2012**, *7*, e34992, doi:10.1371/journal.pone.0034992.
- 683 40. Lee, H.B.; Schwab, T.L.; Sigafos, A.N.; Gauerke, J.L.; Krug, R.G.; Serres, M.R.; Jacobs, D.C.;  
684 Cotter, R.P.; Das, B.; Petersen, M.O.; et al. Novel zebrafish behavioral assay to identify modifiers  
685 of the rapid, nongenomic stress response. *Genes Brain Behav* **2019**, *18*, doi:10.1111/gbb.12549.
- 686 41. Am, S.; Av, K. The behavioral effects of acute  $\Delta^9$ -tetrahydrocannabinol and heroin  
687 (diacetylmorphine) exposure in adult zebrafish. *Brain Res* **2013**, *1543*, 109–119,  
688 doi:10.1016/j.brainres.2013.11.002.



- 689 42. Levin, E.D.; Bencan, Z.; Cerutti, D.T. Anxiolytic effects of nicotine in zebrafish. *Physiol. Behav.*  
690 **2007**, *90*, 54–58, doi:10.1016/j.physbeh.2006.08.026.
- 691 43. Basnet, R.M.; Zizioli, D.; Taweedet, S.; Finazzi, D.; Memo, M. Zebrafish Larvae as a Behavioral  
692 Model in Neuropharmacology. *Biomedicines* **2019**, *7*, doi:10.3390/biomedicines7010023.
- 693 44. Petzold, A.M.; Balciunas, D.; Sivasubbu, S.; Clark, K.J.; Bedell, V.M.; Westcot, S.E.; Myers, S.R.;  
694 Moulder, G.L.; Thomas, M.J.; Ekker, S.C. Nicotine response genetics in the zebrafish. *PNAS*  
695 **2009**, *106*, 18662–18667, doi:10.1073/pnas.0908247106.
- 696 45. Ahmed, K.T.; Amin, M.R.; Shah, P.; Ali, D.W. Motor neuron development in zebrafish is altered  
697 by brief (5-hr) exposures to THC ( $\Delta^9$ -tetrahydrocannabinol) or CBD (cannabidiol) during  
698 gastrulation. *Sci Rep* **2018**, *8*, 1–14, doi:10.1038/s41598-018-28689-z.
- 699 46. López-Patiño, M.A.; Yu, L.; Cabral, H.; Zhdanova, I.V. Anxiogenic effects of cocaine withdrawal  
700 in zebrafish. *Physiol. Behav.* **2008**, *93*, 160–171, doi:10.1016/j.physbeh.2007.08.013.
- 701 47. Krook, J.T.; Duperreault, E.; Newton, D.; Ross, M.S.; Hamilton, T.J. Repeated ethanol exposure  
702 increases anxiety-like behaviour in zebrafish during withdrawal. *PeerJ* **2019**, *7*, e6551,  
703 doi:10.7717/peerj.6551.
- 704 48. Vaz, R.; Hofmeister, W.; Lindstrand, A. Zebrafish Models of Neurodevelopmental Disorders:  
705 Limitations and Benefits of Current Tools and Techniques. *International Journal of Molecular*  
706 *Sciences* **2019**, *20*, 1296, doi:10.3390/ijms20061296.
- 707 49. Eachus, H.; Bright, C.; Cunliffe, V.T.; Placzek, M.; Wood, J.D.; Watt, P.J. Disrupted-in-  
708 Schizophrenia-1 is essential for normal hypothalamic-pituitary-interrenal (HPI) axis function.  
709 *Hum. Mol. Genet.* **2017**, *26*, 1992–2005, doi:10.1093/hmg/ddx076.
- 710 50. Wood, J.D.; Bonath, F.; Kumar, S.; Ross, C.A.; Cunliffe, V.T. Disrupted-in-schizophrenia 1 and  
711 neuregulin 1 are required for the specification of oligodendrocytes and neurones in the  
712 zebrafish brain. *Hum. Mol. Genet.* **2009**, *18*, 391–404, doi:10.1093/hmg/ddn361.
- 713 51. Drerup, C.M.; Wiora, H.M.; Topczewski, J.; Morris, J.A. Disc1 regulates foxd3 and sox10  
714 expression, affecting neural crest migration and differentiation. *Development* **2009**, *136*, 2623–  
715 2632, doi:10.1242/dev.030577.
- 716 52. Ogungbemi, A.; Leuthold, D.; Scholz, S.; Küster, E. Hypo- or hyperactivity of zebrafish embryos  
717 provoked by neuroactive substances: a review on how experimental parameters impact the  
718 predictability of behavior changes. *Environmental Sciences Europe* **2019**, *31*, 88,  
719 doi:10.1186/s12302-019-0270-5.
- 720 53. Engleman, E.A.; Katner, S.N.; Neal-Beliveau, B.S. Caenorhabditis elegans as a Model to Study  
721 the Molecular and Genetic Mechanisms of Drug Addiction. *Prog Mol Biol Transl Sci* **2016**, *137*,  
722 229–252, doi:10.1016/bs.pmbts.2015.10.019.
- 723 54. Shipley, A.T.; Imeh-Nathaniel, A.; Orfanakos, V.B.; Wormack, L.N.; Huber, R.; Nathaniel, T.I.  
724 The Sensitivity of the Crayfish Reward System to Mammalian Drugs of Abuse. *Front. Physiol.*  
725 **2017**, *8*, doi:10.3389/fphys.2017.01007.
- 726 55. Berridge, K.C.; Kringelbach, M.L. Affective neuroscience of pleasure: reward in humans and  
727 animals. *Psychopharmacology (Berl)* **2008**, *199*, 457–480, doi:10.1007/s00213-008-1099-6.
- 728 56. Tzschentke, T.M. Measuring reward with the conditioned place preference paradigm: a  
729 comprehensive review of drug effects, recent progress and new issues. *Prog. Neurobiol.* **1998**, *56*,  
730 613–672.

- 731 57. García-González, J.; Brock, A.J.; Parker, M.O.; Riley, R.J.; Joliffe, D.; Sudwarts, A.; Teh, M.-T.;  
732 Busch-Nentwich, E.M.; Stemple, D.L.; Martineau, A.R.; et al. Identification of slit3 as a locus  
733 affecting nicotine preference in zebrafish and human smoking behaviour. *Elife* **2020**, *9*,  
734 doi:10.7554/eLife.51295.
- 735 58. Kedikian, X.; Faillace, M.P.; Bernabeu, R. Behavioral and Molecular Analysis of Nicotine-  
736 Conditioned Place Preference in Zebrafish. *PLOS ONE* **2013**, *8*, e69453,  
737 doi:10.1371/journal.pone.0069453.
- 738 59. Ponzoni, L.; Braidà, D.; Pucci, L.; Andrea, D.; Fasoli, F.; Manfredi, I.; Papke, R.L.; Stokes, C.;  
739 Cannazza, G.; Clementi, F.; et al. The cytisine derivatives, CC4 and CC26, reduce nicotine-  
740 induced conditioned place preference in zebrafish by acting on heteromeric neuronal nicotinic  
741 acetylcholine receptors. *Psychopharmacology (Berl.)* **2014**, *231*, 4681–4693, doi:10.1007/s00213-014-  
742 3619-x.
- 743 60. Brock, A.J.; Goody, S.M.G.; Mead, A.N.; Sudwarts, A.; Parker, M.O.; Brennan, C.H. Assessing  
744 the Value of the Zebrafish Conditioned Place Preference Model for Predicting Human Abuse  
745 Potential. *J. Pharmacol. Exp. Ther.* **2017**, *363*, 66–79, doi:10.1124/jpet.117.242628.
- 746 61. Bates, D.; Mächler, M.; Bolker, B.; Walker, S. Fitting Linear Mixed-Effects Models Using lme4.  
747 *Journal of Statistical Software* **2015**, *67*, 1–48, doi:10.18637/jss.v067.i01.
- 748 62. Fox, J.; Weisberg, S.; Price, B.; Adler, D.; Bates, D.; Baud-Bovy, G.; Bolker, B.; Ellison, S.; Firth,  
749 D.; Friendly, M.; et al. *car: Companion to Applied Regression*; 2019;
- 750 63. Lenth, R.; Singmann, H.; Love, J.; Buerkner, P.; Herve, M. *emmeans: Estimated Marginal Means,*  
751 *aka Least-Squares Means*; 2019;
- 752 64. Zeileis, A.; Cribari-Neto, F.; Gruen, B.; Kosmidis, I.; by), A.B.S. (earlier version; by), A.V.R.  
753 (earlier version *betareg: Beta Regression*; 2019;
- 754 65. Plan, E.L. Modeling and Simulation of Count Data. *CPT Pharmacometrics Syst Pharmacol* **2014**, *3*,  
755 e129, doi:10.1038/psp.2014.27.
- 756

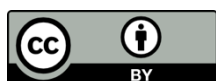

© 2020 by the authors. Submitted for possible open access publication under the terms and conditions of the Creative Commons Attribution (CC BY) license (<http://creativecommons.org/licenses/by/4.0/>).
